# Supplementary material
Source: PubMed Central journal article supplement (PMC5554117)
Supplement: NIHMS884418-supplement-11538_2017_299_MOESM1_ESM.pdf [file NIHMS884418-supplement-11538_2017_299_MOESM1_ESM.pdf]

## Supplementary Materials for

### **A Mathematical Model of Cell Cycle Dysregulation Due to Human Papillomavirus Infection**

Anna K. Miller\*, Karl Munger, Frederick R. Adler

\*Corresponding author

Department of Mathematics, University of Utah  
E-mail: amiller@math.utah.edu

Submitted to the *Bulletin of Mathematical Biology*  
September 20, 2016

**This PDF file includes:**

Table S1: The relative sensitivity of the limit point ratio for all parameters

Table S2: The relative sensitivity of the  $G_1/S$  transition time for all parameters

**Table S1** Relative sensitivity of limit point ratio

| Parameter     | $E7 = 0$ | LR $E7 = 5 \times 10^{-5} \mu\text{M}$ | HR $E7 = 5 \times 10^{-5} \mu\text{M}$ |
|---------------|----------|----------------------------------------|----------------------------------------|
| $E7$          | 0.000    | -3.106                                 | -2.636                                 |
| $k_1$         | 11.210   | 6.387                                  | 0.818                                  |
| $k_{-1}$      | -12.861  | -4.881                                 | -0.547                                 |
| $k_2$         | 5.009    | 1.576                                  | 0.026                                  |
| $k_{-2}$      | -5.878   | -1.015                                 | -0.011                                 |
| $k_3$         | 0.000    | -0.532                                 | -0.487                                 |
| $k_{-3}$      | 0.000    | 0.887                                  | 1.320                                  |
| $k_4$         | 0.000    | -0.118                                 | -0.009                                 |
| $k_{-4}$      | 0.000    | 0.288                                  | 0.036                                  |
| $k_5$         | 0.000    | -1.891                                 | -1.743                                 |
| $k_{-5}$      | 0.000    | 0.955                                  | 0.130                                  |
| $k_6$         | 0.000    | -0.482                                 | -0.043                                 |
| $k_{-6}$      | 0.000    | 0.225                                  | 0.003                                  |
| $k_{-7}$      | 0.000    | -1.348                                 | -0.492                                 |
| $k_{-8}$      | 0.000    | -0.324                                 | -0.010                                 |
| $\rho_{1u}$   | -3.981   | -1.972                                 | -0.112                                 |
| $\rho_{1c}$   | 4.211    | 2.116                                  | 0.072                                  |
| $\rho_{2u}$   | -5.633   | -2.396                                 | -0.073                                 |
| $\rho_{2c}$   | 0.780    | 1.345                                  | 0.306                                  |
| $\rho_{i1u}$  | 0.000    | -0.084                                 | -0.005                                 |
| $\rho_{i1c}$  | 0.000    | 0.082                                  | 0.006                                  |
| $\rho_{i2u}$  | 0.000    | -0.236                                 | -0.220                                 |
| $\rho_{i2c}$  | 0.000    | 0.018                                  | 0.011                                  |
| $\rho_{d1c}$  | -4.757   | -2.510                                 | -0.328                                 |
| $\rho_{d1u}$  | 3.642    | 1.849                                  | 0.070                                  |
| $\rho_{d2u}$  | 4.293    | 1.237                                  | 0.011                                  |
| $\rho_{di1c}$ | 0.000    | -0.028                                 | -0.010                                 |
| $\rho_{di1u}$ | 0.000    | 0.168                                  | 0.229                                  |
| $\alpha_{2u}$ | -9.048   | -2.105                                 | -0.004                                 |
| $\delta_D$    | 0.0004   | -0.0007                                | -0.0002                                |
| $\delta_E$    | 4.719    | 1.359                                  | 0.002                                  |
| $K_E$         | 8.564    | 3.518                                  | 0.257                                  |
| $RE_0$        | -50.865  | -6.935                                 | -1.897                                 |
| $R_0$         | 20.471   | 8.819                                  | 2.018                                  |

**Table S2** Relative sensitivity of G1/S transition time for  $GF = 0.1 \mu\text{M}$ 

| Parameter     | $E7 = 0$ | LR $E7 = 5 \times 10^{-5} \mu\text{M}$ | HR $E7 = 5 \times 10^{-5} \mu\text{M}$ |
|---------------|----------|----------------------------------------|----------------------------------------|
| $E7$          | 0.000    | -0.324                                 | -0.880                                 |
| $k_1$         | 0.133    | 0.127                                  | 0.120                                  |
| $k_{-1}$      | -0.114   | -0.085                                 | -0.040                                 |
| $k_2$         | 0.886    | 0.662                                  | 0.200                                  |
| $k_{-2}$      | -1.276   | -0.493                                 | -0.080                                 |
| $k_3$         | 0.000    | -0.014                                 | -0.080                                 |
| $k_{-3}$      | 0.000    | 0.014                                  | 0.160                                  |
| $k_4$         | 0.000    | -0.042                                 | -0.080                                 |
| $k_{-4}$      | 0.000    | 0.127                                  | 0.400                                  |
| $k_5$         | 0.000    | -0.042                                 | -0.160                                 |
| $k_{-5}$      | 0.000    | 0.014                                  | 0.000                                  |
| $k_6$         | 0.000    | -0.211                                 | -0.400                                 |
| $k_{-6}$      | 0.000    | 0.113                                  | 0.000                                  |
| $k_{-7}$      | 0.000    | -0.028                                 | -0.040                                 |
| $k_{-8}$      | 0.000    | -0.155                                 | -0.120                                 |
| $\rho_{1u}$   | -0.048   | -0.028                                 | 0.000                                  |
| $\rho_{1c}$   | -0.095   | -0.085                                 | -0.120                                 |
| $\rho_{2u}$   | -0.400   | -0.268                                 | 0.000                                  |
| $\rho_{2c}$   | -0.867   | -0.634                                 | -0.360                                 |
| $\rho_{i1u}$  | 0.000    | -0.014                                 | -0.040                                 |
| $\rho_{i1c}$  | 0.000    | -0.014                                 | 0.000                                  |
| $\rho_{i2u}$  | 0.000    | -0.042                                 | -0.120                                 |
| $\rho_{i2c}$  | 0.000    | -0.014                                 | 0.000                                  |
| $\rho_{d1c}$  | 0.067    | 0.042                                  | 0.040                                  |
| $\rho_{d1u}$  | 0.029    | 0.014                                  | 0.000                                  |
| $\rho_{d2u}$  | 0.267    | 0.141                                  | 0.040                                  |
| $\rho_{di1c}$ | 0.000    | 0.014                                  | 0.000                                  |
| $\rho_{di1u}$ | 0.000    | 0.014                                  | 0.000                                  |
| $\alpha_{2u}$ | -1.895   | -1.282                                 | -0.600                                 |
| $\delta_D$    | 0.105    | 0.085                                  | 0.080                                  |
| $\delta_E$    | 0.876    | 0.620                                  | 0.200                                  |
| $K_E$         | 1.067    | 0.845                                  | 0.440                                  |
| $RE_0$        | -9.400   | -2.761                                 | -1.720                                 |
| $R_0$         | 1.781    | 1.296                                  | 0.880                                  |
